# Supplementary material for: Temporal distribution, behaviour and reactivities of BTEX compounds in a suburban Atlantic area during a year
Source: Royal Society of Chemistry journal article supplement (doi:10.1039/b819370c), 2009-01-01
Supplement: b819370c.pdf [file b819370c.pdf]

Sampling dates:

Summer sampling dates: 05-06/07/05; 13-14/07/05; 21-22/07/05; 29-30/07/05; 06-07/08/05; 23-24/08/05; 29-30/08/05; 07-08/09/05; 15-16/09/05.

Autumn sampling dates: 23-24/09/05; 01-02/10/05; 09-10/10/05; 17-18/10/05; 25-26/10/05; 02-03/11/05; 10-11/11/05; 18-19/11/05; 26-27/11/05; 04-05/12/05; 12-13/12/05.

Winter sampling dates: 20-21/12/05; 28-29/12/05; 04-05/01/06; 19-20/01/06; 27-28/01/06; 05-06/02/06; 13-14/02/06; 21-22/02/06; 01-02/03/06; 09-10/03/06; 17-18/03/06.

Spring sampling dates: 01-02/04/06; 02-03/04/06; 10-11/04/06; 18-19/04/06; 26-27/04/06; 04-05/05/06; 12-13/05/06; 20-21/05/06; 28-29/05/06; 05-06/06/06; 06-07/06/06; 07-08/06/06; 08-09/06/06; 09-10/06/06; 10-11/06/06; 13-14/06/06; 21-22/06/06
